# Supplementary material for: Fast and facile preparation of PEGylated graphene from graphene oxide by lysosome targeting delivery of photosensitizer to efficiently enhance photodynamic therapy
Source: Royal Society of Chemistry journal article supplement (doi:10.1039/c5ra07535a), 2015-01-01
Supplement: c5ra07535a1.pdf [file c5ra07535a1.pdf]

# Fast and Facile Preparation of PEGylation Graphene from Graphene Oxide by Lysosome Targeting Delivery of Photosensitizer to Efficiently Enhance Photodynamic Therapy

Yiping Zeng,<sup>a1</sup> Zhangyou Yang,<sup>a1</sup> Shenglin Luo,<sup>a</sup> Hong Li,<sup>a</sup> Cong Liu,<sup>a</sup> Yuhui Hao,<sup>a</sup> Jing Liu,<sup>a</sup> Weidong Wang<sup>b,\*</sup> and Rong Li<sup>a,\*</sup>

<sup>a</sup> State Key Laboratory of Trauma Burns and Combined Injury, Institute of Combined Injury, Chongqing Engineering Research Center for Nanomedicine, College of Preventive Medicine, Third Military Medical University, Chongqing 400038, China

<sup>b</sup> Department of Radiation Oncology, Shanghai Sixth People Hospital, Shanghai Jiao Tong University, Shanghai 200233, China

E-mail: [lrong361@126.com](mailto:lrong361@126.com) and [wwdwyl@sina.com](mailto:wwdwyl@sina.com)

## Supplementary information

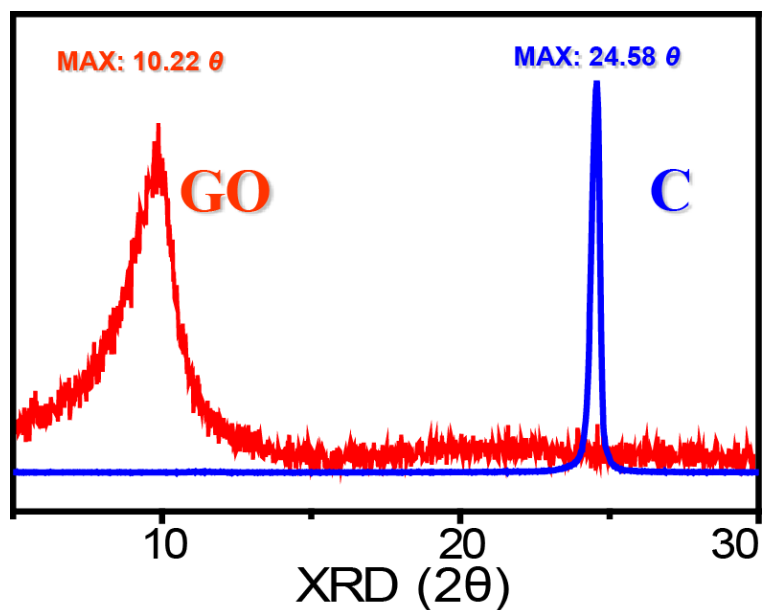

**Figure S1.** The XRD spectrum of natural graphite and GO

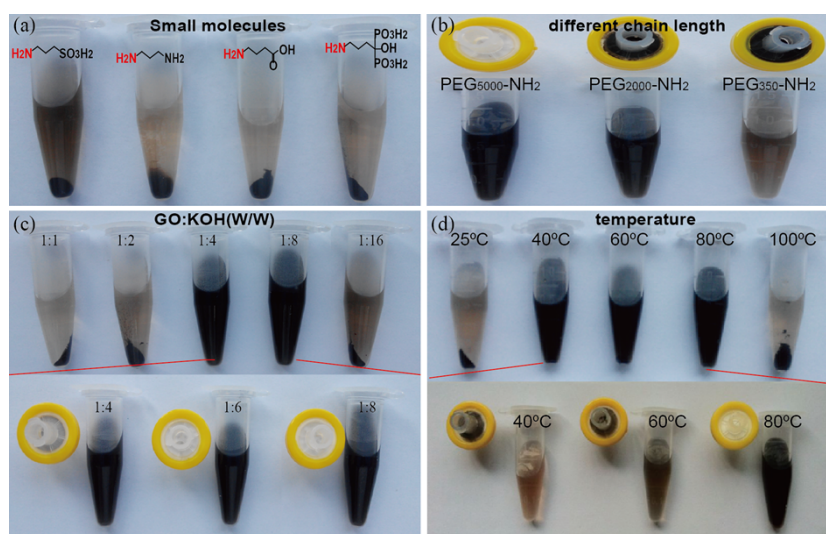

**Figure S2.** (a) The photos of NGO-PEG samples prepared with small molecules after centrifugation at 7000 r/min for 3 min. (b) The photos of NGO-PEG samples prepared with different chain length after centrifugation at 7000 r/min for 3 min. (c) The photos of NGO-PEG samples prepared with different ratio of GO and KOH (w/w). (d) The photos of NGO-PEG samples prepared with different temperature.

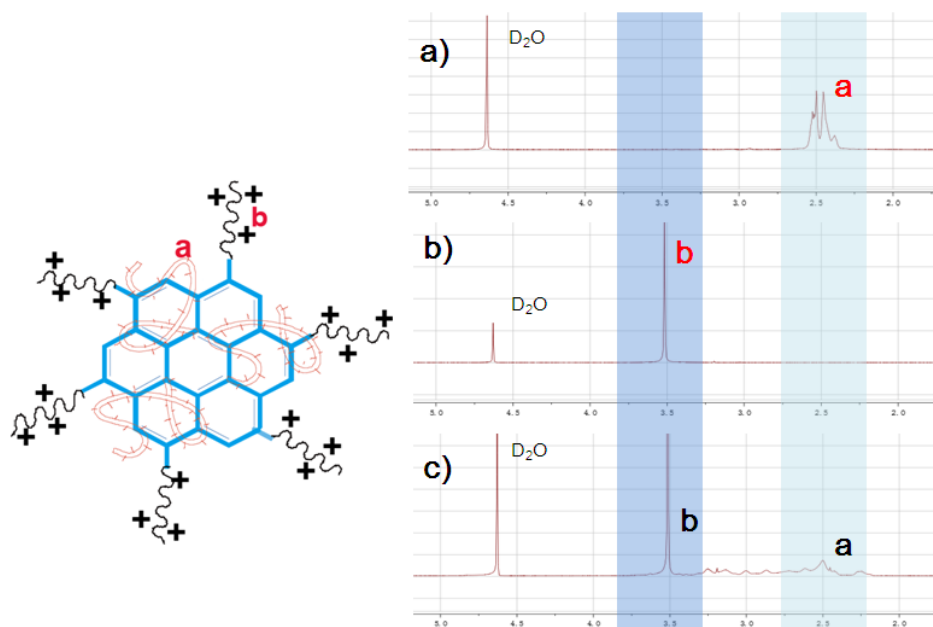

**Figure S3.** The  $^1\text{H}$  NMR spectra of (a) BPEI, (b) NGO-PEG, (c) NGO-PEG-BPEI.

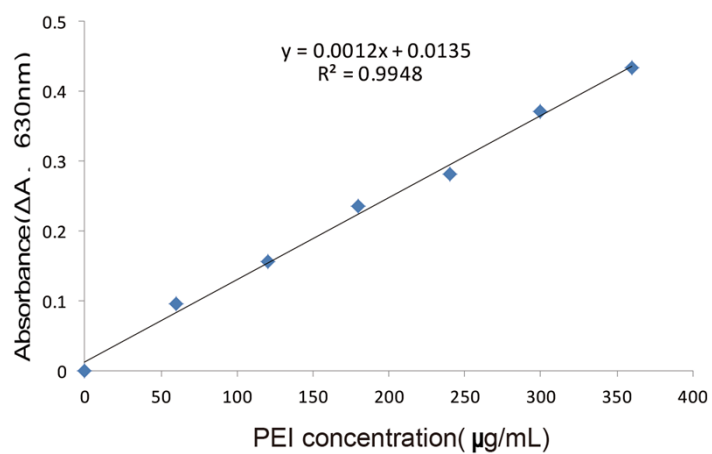

**Figure S4.** The standard curve of measured the absorbance of cuprammonium complexes formed between BPEI and copper ion ( II ) at 630 nm at a series of PEI concentrations.

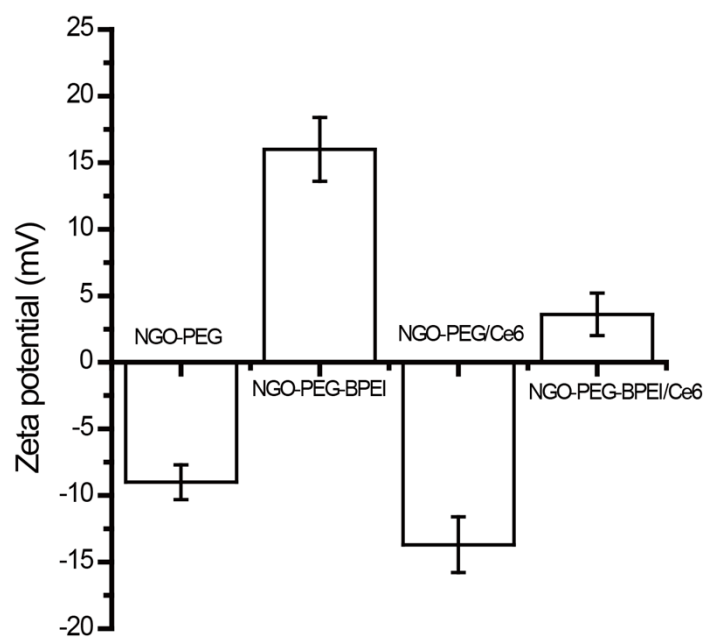

**Figure S5.** Zeta potentials of NGO-PEG, NGO-PEG-BPEI, NGO-PEG-Ce6 and NGO-PEG-BPEI-Ce6.

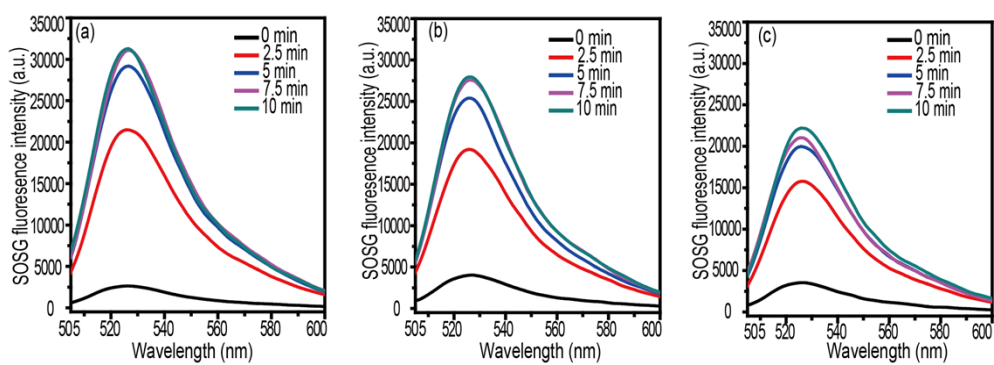

**Figure S6.** Fluorescence emission spectra of free Ce6 (a), NGO-PEG-Ce6 (b) and NGO-PEG-BPEI-Ce6 (c) in singlet oxygen sensor green (SOSG) solution at different laser irradiation time points.

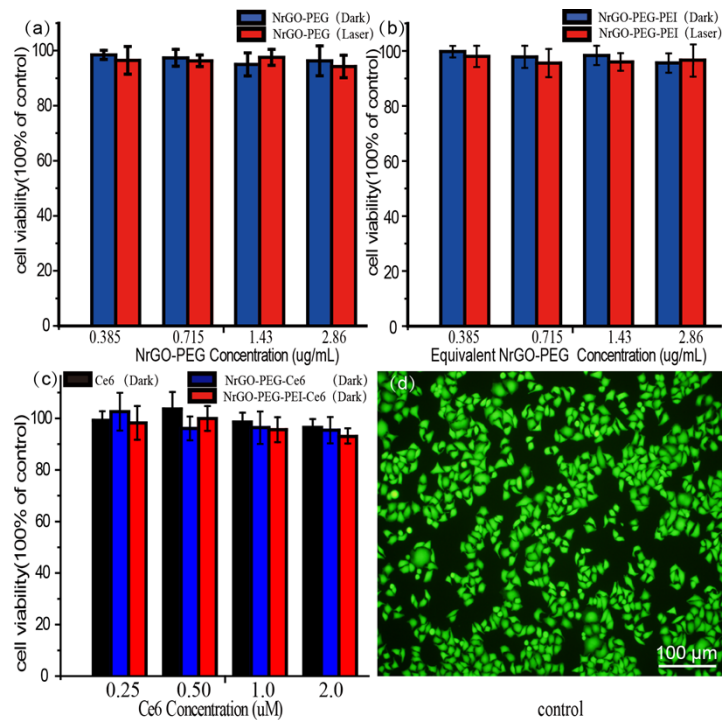

**Figure S7.** Relative cell viability data obtained from the CCK-8 assay of HeLa cells after treated with NGO-PEG (a) and NGO-PEG-BPEI (b) without/with light irradiation by 662 nm laser, (c) Relative cell viability data obtained from the CCK-8 assay of HeLa cells after treated with Ce6, NGO-PEG-Ce6 and NGO-PEG-BPEI-Ce6 without light irradiation, the cell viability values were all normalized to control untreated cells. (d) Fluorescence image of Calcein AM /propidium iodide stained HeLa cells incubated with PBS (control group). Error bars were based on SD of triplicate parallel samples.

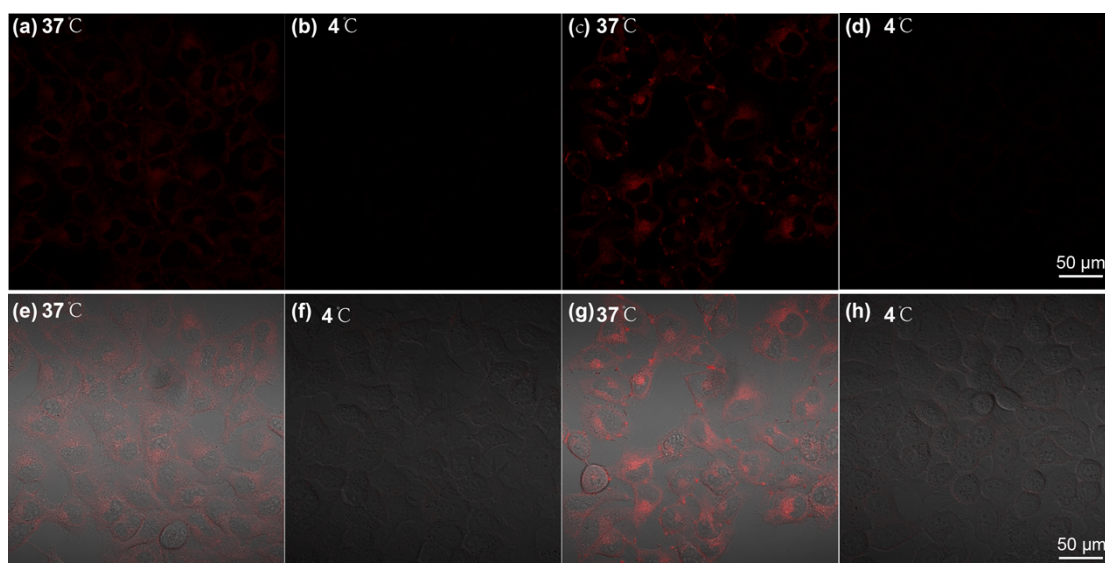

**Figure S8.** Fluorescent image (a, b) and phase contrast overlapped image (e, f) of HeLa cells incubated with NGO-PEG-Ce6 (2  $\mu$ M Ce6) at 4°C for 2 h. Fluorescence image (c, d) and phase contrast overlapped image (g, h) of HeLa cells incubated with NGO-PEG-BPEI-Ce6 (2  $\mu$ M Ce6) at 37 °C for 2 h.

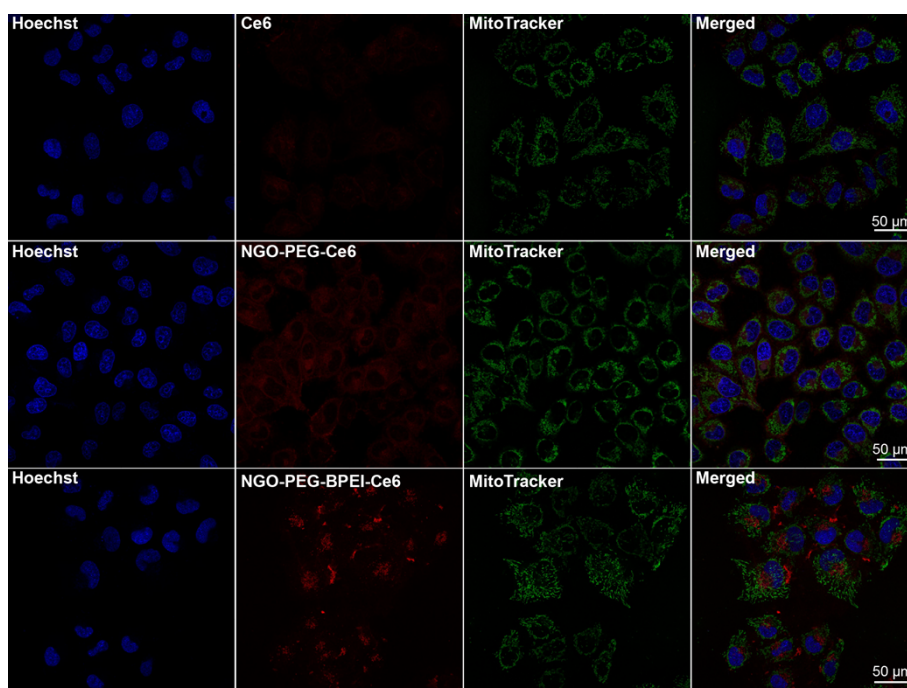

**Figure S9.** Localization image of Ce6, NGO-PEG-Ce6 and NGO-PEG-BPEI-Ce6 stained HeLa cells, incubated with 2  $\mu$ M free Ce6 or equivalent amount of NGO-PEG-Ce6 and NGO-PEG-BPEI-Ce6 (Mitotracker stained mitochondria).

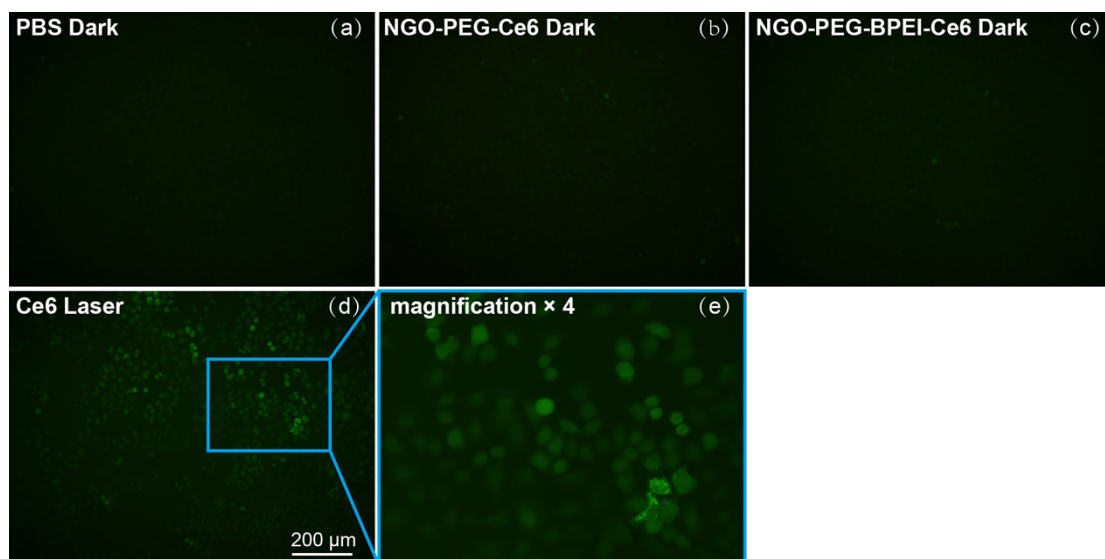

**Figure S10.** Fluorescence image of determination ROS producing ability by DCFH-DA method with fluorescence microscope incubated with PBS (a) 1 μM free Ce6 (d, e), equivalent amount of NGO-PEG-Ce6 (b) and NGO-PEG-BPEI-Ce6 (c) for 24 h without irradiation

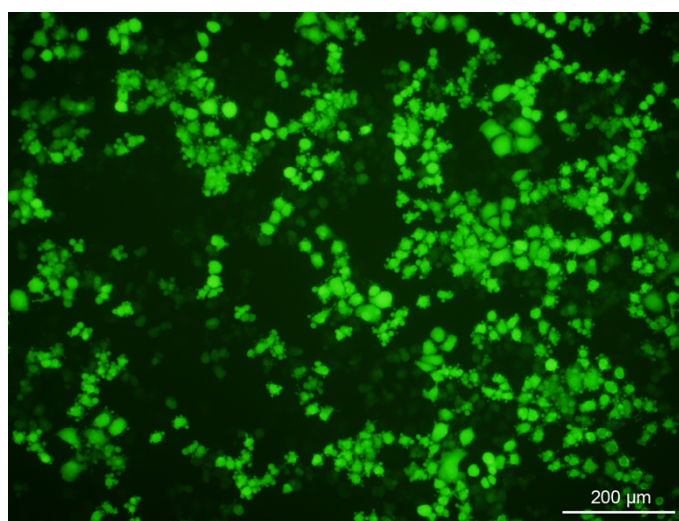

**Figure S11.** The magnification Fluorescence image of determination ROS producing ability of the cell treated with NGO-PEG-PEI-Ce6
